# Supplementary material
Source: publisher site journal article supplement (https://www.dovepress.com/article/552016)
Supplement: Supplementary file 1 [file 552016%20Revised%20Supplementary%20Material.docx]

**Table S1. Distribution of difficulty initiating sleep and its association with aggression**

| Variables | Without (n = 450) | Mild (n = 126) | Moderate (n = 72) | Severe (n = 18) | Extremely severe (n = 5) | *P* |
| --- | --- | --- | --- | --- | --- | --- |
|
| Verbal, n(%) |  |  |  |  |  | <0.001 |
| Without | 381 (84.67) | 86 (68.25) | 38 (52.78) | 10 (55.56) | 3 (60.00) |  |
| With | 69 (15.33) | 40 (31.75) | 34 (47.22) | 8 (44.44) | 2 (40.00) |  |
| Property, n(%) |  |  |  |  |  | <0.001 |
| Without | 428 (95.11) | 112 (88.89) | 58 (80.56) | 16 (88.89) | 5 (100.00) |  |
| With | 22 (4.89) | 14 (11.11) | 14 (19.44) | 2 (11.11) | 0 (0.00) |  |
| Auto, n(%) |  |  |  |  |  | 0.006 |
| Without | 436 (96.89) | 118 (93.65) | 64 (88.89) | 15 (83.33) | 5 (100.00) |  |
| With | 14 (3.11) | 8 (6.35) | 8 (11.11) | 3 (16.67) | 0 (0.00) |  |
| Physical, n(%) |  |  |  |  |  | <0.001 |
| Without | 429 (95.33) | 115 (91.27) | 58 (80.56) | 15 (83.33) | 4 (80.00) |  |
| With | 21 (4.67) | 11 (8.73) | 14 (19.44) | 3 (16.67) | 1 (20.00) |  |
| Any Aggression a, n(%) |  |  |  |  |  | <0.001 |
| Without | 364 (80.89) | 81 (64.29) | 31 (43.06) | 9 (50.00) | 3 (60.00) |  |
| With | 86 (19.11) | 45 (35.71) | 41 (56.94) | 9 (50.00) | 2 (40.00) |  |
| Clinically relevant aggression b, n(%) |  |  |  |  |  | <0.001 |
| Without | 405 (90.00) | 106 (84.13) | 46 (63.89) | 12 (66.67) | 4 (80.00) |  |
| With | 45 (10.00) | 20 (15.87) | 26 (36.11) | 6 (33.33) | 1 (20.00) |  |

a Score of one or above on any aggression domain

b A total Modified Overt Aggression Scale score of ≥3

**Table S2. Distribution of difficulty maintaining sleep and its association with aggression**

| Variables | Without (n = 457) | Mild (n = 138) | Moderate (n = 58) | Severe (n = 16) | Extremely severe (n = 2) | *P* |
| --- | --- | --- | --- | --- | --- | --- |
|
| Verbal, n(%) |  |  |  |  |  | <0.001 |
| Without | 380 (83.15) | 92 (66.67) | 36 (62.07) | 10 (62.50) | 0 (0.00) |  |
| With | 77 (16.85) | 46 (33.33) | 22 (37.93) | 6 (37.50) | 2 (100.00) |  |
| Property, n(%) |  |  |  |  |  | <0.001 |
| Without | 440 (96.28) | 114 (82.61) | 49 (84.48) | 14 (87.50) | 2 (100.00) |  |
| With | 17 (3.72) | 24 (17.39) | 9 (15.52) | 2 (12.50) | 0 (0.00) |  |
| Auto, n(%) |  |  |  |  |  | 0.021 |
| Without | 442 (96.72) | 128 (92.75) | 51 (87.93) | 15 (93.75) | 2 (100.00) |  |
| With | 15 (3.28) | 10 (7.25) | 7 (12.07) | 1 (6.25) | 0 (0.00) |  |
| Physical, n(%) |  |  |  |  |  | 0.006 |
| Without | 433 (94.75) | 121 (87.68) | 51 (87.93) | 15 (93.75) | 1 (50.00) |  |
| With | 24 (5.25) | 17 (12.32) | 7 (12.07) | 1 (6.25) | 1 (50.00) |  |
| Any Aggression a, n(%) |  |  |  |  |  | <0.001 |
| Without | 365 (79.87) | 82 (59.42) | 32 (55.17) | 9 (56.25) | 0 (0.00) |  |
| With | 92 (20.13) | 56 (40.58) | 26 (44.83) | 7 (43.75) | 2 (100.00) |  |
| Clinically relevant aggression b, n(%) |  |  |  |  |  | <0.001 |
| Without | 413 (90.37) | 106 (76.81) | 40 (68.97) | 13 (81.25) | 1 (50.00) |  |
| With | 44 (9.63) | 32 (23.19) | 18 (31.03) | 3 (18.75) | 1 (50.00) |  |

a Score of one or above on any aggression domain

b A total Modified Overt Aggression Scale score of ≥3

**Table S3. Distribution of early morning awakening and its association with aggression**

| Variables | Without (n = 463) | Mild (n = 144) | Moderate (n = 45) | Severe (n = 16) | Extremely severe (n = 3) | *P* |
| --- | --- | --- | --- | --- | --- | --- |
|
| Verbal, n(%) |  |  |  |  |  | <0.001 |
| Without | 376 (81.21) | 106 (73.61) | 29 (64.44) | 6 (37.50) | 1 (33.33) |  |
| With | 87 (18.79) | 38 (26.39) | 16 (35.56) | 10 (62.50) | 2 (66.67) |  |
| Property, n(%) |  |  |  |  |  | 0.006 |
| Without | 438 (94.60) | 127 (88.19) | 37 (82.22) | 14 (87.50) | 3 (100.00) |  |
| With | 25 (5.40) | 17 (11.81) | 8 (17.78) | 2 (12.50) | 0 (0.00) |  |
| Auto, n(%) |  |  |  |  |  | 0.046 |
| Without | 447 (96.54) | 130 (90.28) | 43 (95.56) | 15 (93.75) | 3 (100.00) |  |
| With | 16 (3.46) | 14 (9.72) | 2 (4.44) | 1 (6.25) | 0 (0.00) |  |
| Physical, n(%) |  |  |  |  |  | 0.050 |
| Without | 434 (93.74) | 133 (92.36) | 38 (84.44) | 14 (87.50) | 2 (66.67) |  |
| With | 29 (6.26) | 11 (7.64) | 7 (15.56) | 2 (12.50) | 1 (33.33) |  |
| Any Aggression a, n(%) |  |  |  |  |  | <0.001 |
| Without | 359 (77.54) | 96 (66.67) | 27 (60.00) | 5 (31.25) | 1 (33.33) |  |
| With | 104 (22.46) | 48 (33.33) | 18 (40.00) | 11 (68.75) | 2 (66.67) |  |
| Clinically relevant aggression b, n(%) |  |  |  |  |  | 0.008 |
| Without | 409 (88.34) | 116 (80.56) | 35 (77.78) | 11 (68.75) | 2 (66.67) |  |
| With | 54 (11.66) | 28 (19.44) | 10 (22.22) | 5 (31.25) | 1 (33.33) |  |

a Score of one or above on any aggression domain

b A total Modified Overt Aggression Scale score of ≥3

**Table S4. Multicollinearity test**

| Variable | Tolerance | VIF |
| --- | --- | --- |
| Age | 0.297 | 3.370 |
| Gender | 0.894 | 1.119 |
| Illness duration | 0.286 | 3.494 |
| Total antipsychotic dosage | 0.647 | 1.546 |
| Clozapine usage | 0.765 | 1.307 |
| Polypharmacy | 0.610 | 1.640 |
| Difficult initialing sleep | 0.650 | 1.538 |
| Difficult maintaining sleep | 0.650 | 1.539 |
| Early morning awakening | 0.738 | 1.356 |
| PANSS positive factor | 0.613 | 1.632 |
| PANSS mood factor | 0.627 | 1.596 |
| PANSS negative factor | 0.507 | 1.972 |
| PANSS excitement factor | 0.527 | 1.897 |
| PANSS cognition factor | 0.340 | 2.940 |

Note: PANSS: Positive and Negative Syndrome Scale

**Table S5.** Multivariable Logistic Regression Analysis of Factors Associated with Aggression in the imputed sample (N=671)

| Variable | AOR | 95% CI | p-value |
| --- | --- | --- | --- |
| Difficulty initiating sleep | 2.815 | 1.410-5.619 | 0.003 |
| Antipsychotic polypharmacy | 0.542 | 0.294-0.997 | 0.049 |
| PANSS positive symptoms | 1.056 | 1.009-1.106 | 0.020 |
| PANSS excitement symptoms | 1.166 | 1.082-1.256 | <0.001 |
| Female gender | 0.483 | 0.277-0.842 | 0.010 |
| Antipsychotic dosage (mg/day) | 1.001 | 1.000-1.002 | 0.047 |

Note: The model was adjusted for all three insomnia symptoms, demographic variables (age, gender), and clinical covariates (illness duration, PANSS factor scores, antipsychotic dosage, clozapine use, polypharmacy, and sleep medication usage). Only statistically significant predictors (p < 0.05) from the full model are displayed here for clarity. AOR = Adjusted Odds Ratio. PANSS = Positive and Negative Syndrome Scale. 95% CI = 95% Confidence Interval

**Table S6. Explanatory subgroup analysis based on sex and antipsychotic usage**

| Variables | n (%) | Without aggression | With aggression | AOR (95%CI) | *P* | P for interaction |
| --- | --- | --- | --- | --- | --- | --- |
|  |
| All patients | 548 (100.00) | 45/468 | 30/80 | 3.80 (1.77 ~ 8.21) | <0.001 |  |  |
| Gender |  |  |  |  |  | 0.970 |  |
| Male | 373 (68.07) | 33/322 | 20/51 | 4.81 (1.76 ~ 13.19) | 0.002 |  |  |
| Female | 175 (31.93) | 12/146 | 10/29 | 2.95 (0.74 ~ 11.70) | 0.124 |  |  |
| Polypharmacy |  |  |  |  |  | 0.475 |  |
| Without | 269 (49.09) | 21/228 | 17/41 | 3.34 (0.98 ~ 11.42) | 0.054 |  |  |
| With | 279 (50.91) | 24/240 | 13/39 | 3.90 (1.32 ~ 11.53) | 0.014 |  |  |
| Clozapine usage |  |  |  |  |  | 0.712 |  |
| Without | 343 (62.59) | 28/288 | 19/55 | 4.80 (1.59 ~ 14.53) | 0.005 |  |  |
| With | 205 (37.41) | 17/180 | 11/25 | 3.08 (0.91 ~ 10.43) | 0.070 |  |  |

Note: The model was adjusted for all three insomnia symptoms, demographic variables (age, gender), and clinical covariates (illness duration, PANSS factor scores, antipsychotic dosage, clozapine use, polypharmacy, and sleep medication usage). AOR = Adjusted Odds Ratio. 95% CI = 95% Confidence Interval

**Table S7. Association of insomnia subtype severity with aggression using ISI scores**

|  | Model 1 (COR,95%CI)a | Model 2 (AOR,95%CI)b | Model 3 (AOR,95%CI)c |
| --- | --- | --- | --- |
| Difficulty initiating sleep | 1.81 (1.45 ~ 2.24) *** | 1.54 (1.16 ~ 2.04) ** | 1.46 (1.01 ~ 2.12) * |
| Difficulty maintaining sleep | 1.78 (1.41 ~ 2.26) *** | 1.36 (0.95 ~ 1.93) | 1.52 (0.98 ~ 2.36) |
| Early morning awakening | 1.52 (1.19 ~ 1.93) *** | 0.97 (0.70 ~ 1.35) | 0.73 (0.48 ~ 1.11) |

a Unadjusted model

bAdjusted for the presence of all three insomnia subtypes simultaneously to assess their independent effects

C The model was adjusted for all three insomnia symptoms, demographic variables (age, gender), and clinical covariates (illness duration, PANSS factor scores, antipsychotic dosage, clozapine use, polypharmacy, and sleep medication usage).

Note: COR: crude odds ratio; AOR: adjusted odds ratio; CI: confidence interval; ***: p<0.001; **: p<0.01; *: p<0.05.

Rcode for analysis

library(gtsummary)

library(missRanger)

library(car)

library(pROC)

library(ResourceSelection)

# Read data

data <- read.csv("dataset.csv")

# Variable transformation

data$aggression <- ifelse(data$MOAS_total >= 3, 1, 0)

data$DIS_present <- ifelse(data$ISI1 >= 2, 1, 0)

data$DMS_present <- ifelse(data$ISI2 >= 2, 1, 0)

data$EMA_present <- ifelse(data$ISI3 >= 2, 1, 0)

# Group comparisons

demographic_table <- tbl_summary(

data = data,

by = aggression,

statistic = list(all_continuous() ~ "{mean} ± {sd}",

all_categorical() ~ "{n} ({p}%)"),

digits = all_continuous() ~ 2

) %>% add_p()

# Primary logistic regression models

model1 <- glm(aggression ~ DIS_present, data = data, family = binomial)

model2 <- glm(aggression ~ DIS_present + DMS_present + EMA_present,

data = data, family = binomial)

model3 <- glm(aggression ~ DIS_present + DMS_present + EMA_present +

age + gender + illness_duration + PANSS_positive +

PANSS_negative + PANSS_depression + PANSS_excitement +

PANSS_cognitive + antipsychotic_dose + clozapine_use +

polypharmacy + sleep_medication,

data = data, family = binomial)

# Model diagnostics

vif_values <- car::vif(model3)

auc <- pROC::auc(data$aggression, predict(model3, type = "response"))

hoslem <- ResourceSelection::hoslem.test(data$aggression, fitted(model3))

# Sensitivity analysis - multiple imputation

imputed_data <- missRanger(

data,

pmm.k = 5,

num.trees = 100,

maxiter = 10,

seed = 123

)

model3_imputed <- glm(aggression ~ DIS_present + DMS_present + EMA_present +

age + gender + illness_duration + PANSS_positive +

PANSS_negative + PANSS_depression + PANSS_excitement +

PANSS_cognitive + antipsychotic_dose + clozapine_use +

polypharmacy + sleep_medication,

data = imputed_data, family = binomial)

# Interaction analyses

interaction_gender <- glm(aggression ~ DIS_present * gender +

DMS_present + EMA_present + age + illness_duration +

PANSS_positive + PANSS_negative + PANSS_depression +

PANSS_excitement + PANSS_cognitive + antipsychotic_dose +

clozapine_use + polypharmacy + sleep_medication,

data = data, family = binomial)

interaction_clozapine <- glm(aggression ~ DIS_present * clozapine_use +

DMS_present + EMA_present + age + gender +

illness_duration + PANSS_positive + PANSS_negative +

PANSS_depression + PANSS_excitement + PANSS_cognitive +

antipsychotic_dose + polypharmacy + sleep_medication,

data = data, family = binomial)

interaction_polypharmacy <- glm(aggression ~ DIS_present * polypharmacy +

DMS_present + EMA_present + age + gender +

illness_duration + PANSS_positive + PANSS_negative +

PANSS_depression + PANSS_excitement + PANSS_cognitive +

antipsychotic_dose + clozapine_use + sleep_medication,

data = data, family = binomial)

# Continuous variables analysis

model_continuous <- glm(aggression ~ ISI1 + ISI2 + ISI3 +

age + gender + illness_duration + PANSS_positive +

PANSS_negative + PANSS_depression + PANSS_excitement +

PANSS_cognitive + antipsychotic_dose + clozapine_use +

polypharmacy + sleep_medication,

data = data, family = binomial)

# Exploratory analyses - aggression domains

verbal_model <- glm(verbal_aggression ~ DIS_present + DMS_present + EMA_present +

age + gender + illness_duration + PANSS_positive +

PANSS_negative + PANSS_depression + PANSS_excitement +

PANSS_cognitive + antipsychotic_dose + clozapine_use +

polypharmacy + sleep_medication,

data = data, family = binomial)

property_model <- glm(property_aggression ~ DIS_present + DMS_present + EMA_present +

age + gender + illness_duration + PANSS_positive +

PANSS_negative + PANSS_depression + PANSS_excitement +

PANSS_cognitive + antipsychotic_dose + clozapine_use +

polypharmacy + sleep_medication,

data = data, family = binomial)

auto_model <- glm(auto_aggression ~ DIS_present + DMS_present + EMA_present +

age + gender + illness_duration + PANSS_positive +

PANSS_negative + PANSS_depression + PANSS_excitement +

PANSS_cognitive + antipsychotic_dose + clozapine_use +

polypharmacy + sleep_medication,

data = data, family = binomial)

physical_model <- glm(physical_aggression ~ DIS_present + DMS_present + EMA_present +

age + gender + illness_duration + PANSS_positive +

PANSS_negative + PANSS_depression + PANSS_excitement +

PANSS_cognitive + antipsychotic_dose + clozapine_use +

polypharmacy + sleep_medication,

data = data, family = binomial)

# Create table for aggression prevalence by ISI categories

isi1_aggression_table <- tbl_summary(

data = data,

by = ISI1_cat,

include = aggression,

label = list(aggression = "Aggression"),

statistic = list(all_categorical() ~ "{n} ({p}%)"),

digits = all_categorical() ~ c(0, 1)

) %>% add_p()

isi2_aggression_table <- tbl_summary(

data = data,

by = ISI2_cat,

include = aggression,

label = list(aggression = "Aggression"),

statistic = list(all_categorical() ~ "{n} ({p}%)"),

digits = all_categorical() ~ c(0, 1)

) %>% add_p()

isi3_aggression_table <- tbl_summary(

data = data,

by = ISI3_cat,

include = aggression,

label = list(aggression = "Aggression"),

statistic = list(all_categorical() ~ "{n} ({p}%)"),

digits = all_categorical() ~ c(0, 1)

) %>% add_p()
